# Supplementary material
Source: PubMed Central journal article supplement (PMC6625945)
Supplement: NIHMS1519277-supplement-1.pdf [file NIHMS1519277-supplement-1.pdf]

Supporting Information

A 3-(4-Nitronaphthen-1-yl) amino-benzoate analog as a  
Bifunctional AKR1C3 Inhibitor with AR Antagonist Activity:  
Head to Head Comparison with Other Advanced AKR1C3  
Targeted Therapeutics

*Phumvadee Wangtrakuldee,<sup>1</sup> Adegoke O. Adeniji,<sup>1</sup> Tianzhu Zang,<sup>1</sup> Buddha Khatri,<sup>2</sup> Barry M. Twenter,<sup>2</sup> Michelle A. Estrada,<sup>2</sup> Tyler F. Higgins,<sup>2</sup> Jeffrey D. Winkler,<sup>2\*</sup> Trevor M. Penning.<sup>1\*</sup>*

Synthesis of the following compounds:

- 3-((4-nitronaphthalen-1-yl)amino)benzoic acid (**1**)
- 3-(naphthalen-1-ylamino)benzoic acid (**2**)
- 3-((4,5-dinitronaphthalen-1-yl)amino)benzoic acid (**3**)
- 3-((4-acetylnaphthalen-1-yl)amino)benzoic acid (**4**)
- 5-((4-acetylnaphthalen-1-yl)amino)isophthalic acid (**5**)
- 3-((4-cyanonaphthalen-1-yl)amino)benzoic acid (**6**)
- 3-((4-(trifluoromethyl)naphthalen-1-yl)amino)benzoic acid (**7**)
- 3-((4-fluoronaphthalen-1-yl)amino)benzoic acid (**8**)
- 3-(quinolin-4-ylamino)benzoic acid (**9**)
- 4-(naphthalen-1-ylamino)benzoic acid (**10**)
- 4-((4-acetylnaphthalen-1-yl)amino)benzoic acid (**11**)

2-(naphthalen-1-ylamino)benzoic acid (**12**)

4-methoxy-2-(naphthalen-1-ylamino)benzoic acid (**13**)

5-acetyl-2-(naphthalen-1-ylamino)benzoic acid (**14**)

5-acetyl-2-((4-nitronaphthalen-1-yl)amino)benzoic acid (**15**)

5,5-dimethyl-3-(4-nitronaphthalen-1-yl)imidazolidine-2,4-dione (**16**)

5,5-dimethyl-3-(4-nitronaphthalen-1-yl)-2-thioxoimidazolidin-4-one (**17**)

Table 1S. Gridbox parameters for docking experiments

## Synthesis of Compounds 1-17

### General Procedure

General procedure for synthesis of new compounds: The AKR1C3 compounds were prepared according to the two-step Buchwald-Hartwig coupling/ester saponification sequence as described in Adeniji, *et. al.*, 2012, J. Med. Chem. 55:2311-23. The exception was that diglyme was used instead of toluene as the solvent for the Buchwald-Hartwig couplings.

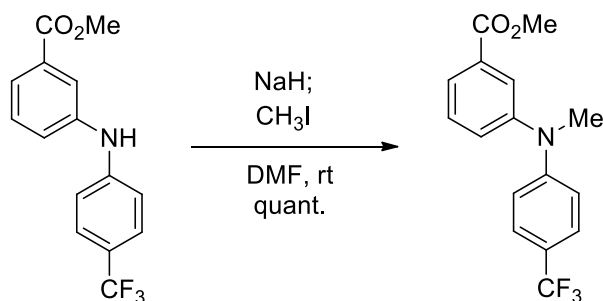

To a solution of the *N*-phenyl aniline (35 mg, 0.119 mmol) in DMF (1 mL) at room temperature was added a suspension of NaH in mineral oil (60% wt/wt, 77 mg, 0.193 mmol), followed by CH<sub>3</sub>I (15  $\mu$ L, 0.233 mmol) dropwise. The reaction mixture was stirred at room temperature overnight. Water was added, and the mixture was extracted with ethyl acetate. The combined organic layers were dried (Na<sub>2</sub>SO<sub>4</sub>) and concentrated to give the *N*-methyl aniline as a red oil (37 mg, quant.) which did not require purification.

In a subsequent step, the ester was saponified to the corresponding acid following the protocol reported in Adeniji, *et. al.*, 2012, J. Med. Chem. 55:2311-23 (0.2M KOH, EtOH, 100°C, 6h). All compounds were > 95% pure based on chromatography and characterized by <sup>1</sup>H-NMR (500 MHz).

**3-((4-nitronaphthalen-1-yl)amino)benzoic acid (1)**

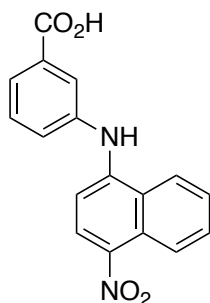

**<sup>1</sup>H NMR** (500 MHz, DMSO-*d*<sub>6</sub>): δ 13.00 (bs, 1H), 9.45 (s, 1H), 8.79 (d, *J* = 8.6 Hz, 1H), 8.53 (d, *J* = 8.3 Hz, 1H), 8.38 (d, *J* = 8.9 Hz, 1H), 7.93 (s, 1H), 7.84 (m, 1H), 7.68–7.76 (m, 2H), 7.63 (m, 1H), 7.55 (m, 1H), 7.13 (d, *J* = 8.8 Hz, 1H).

**3-(naphthalen-1-ylamino)benzoic acid (2)**

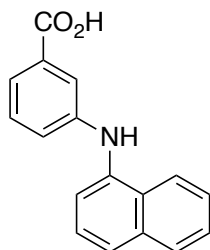

**<sup>1</sup>H NMR** (500 MHz, DMSO-*d*<sub>6</sub>) δ 8.41 (s, 1H), 8.13 (d, *J* = 8.0 Hz, 1H), 7.98 – 7.89 (m, 1H), 7.67 – 7.57 (m, 2H), 7.56 – 7.47 (m, 2H), 7.44 (t, *J* = 7.8 Hz, 1H), 7.40 – 7.35 (m, 2H), 7.31 (t, *J* = 7.8 Hz, 1H), 7.21 (dd, *J* = 8.0, 3.1 Hz, 1H).

**3-((4,5-dinitronaphthalen-1-yl)amino)benzoic acid (3)**

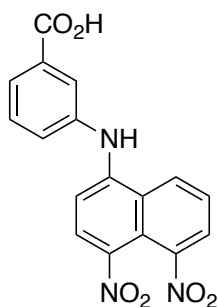

**<sup>1</sup>H NMR** (500 MHz, DMSO-*d*<sub>6</sub>) δ 13.09 (s, 1H), 9.67 (s, 1H), 8.85 (dd, *J* = 8.6, 1.3 Hz, 1H), 8.43 (dd, *J* = 7.6, 1.2 Hz, 1H), 8.32 (d, *J* = 8.9 Hz, 1H), 7.92 (t, *J* = 2.0 Hz, 1H), 7.86 (dd, *J* = 8.7, 7.6

Hz, 1H), 7.75 (dt,  $J = 7.7, 1.4$  Hz, 1H), 7.65 (ddd,  $J = 8.1, 2.4, 1.2$  Hz, 1H), 7.56 (t,  $J = 7.8$  Hz, 1H), 7.19 (d,  $J = 8.9$  Hz, 1H).

**3-((4-acetylnaphthalen-1-yl)amino)benzoic acid (4)**

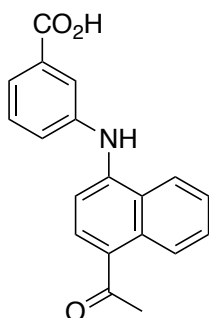

**<sup>1</sup>H NMR** (500 MHz, DMSO-*d*<sub>6</sub>)  $\delta$  12.95 (s, 1H), 9.04 (dd,  $J = 8.7, 1.2$  Hz, 1H), 8.97 (s, 1H), 8.35 (d,  $J = 8.4$  Hz, 1H), 8.13 (d,  $J = 8.2$  Hz, 1H), 7.85 (t,  $J = 2.1$  Hz, 1H), 7.64 (ddd,  $J = 8.4, 6.8, 1.4$  Hz, 1H), 7.60 – 7.54 (m, 2H), 7.53 – 7.49 (m, 1H), 7.46 (t,  $J = 7.8$  Hz, 1H), 7.22 (d,  $J = 8.2$  Hz, 1H), 2.63 (s, 3H).

**5-((4-acetylnaphthalen-1-yl)amino)isophthalic acid (5)**

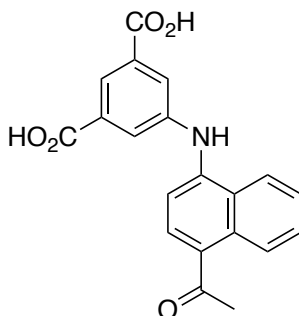

**<sup>1</sup>H NMR** (500 MHz, DMSO-*d*<sub>6</sub>)  $\delta$  9.11 (s, 1H), 8.96 (d,  $J = 8.7$  Hz, 1H), 8.29 (d,  $J = 8.5$  Hz, 1H), 8.14 (d,  $J = 8.1$  Hz, 1H), 8.04 (s, 1H), 7.98 (s, 2H), 7.64 (t,  $J = 7.7$  Hz, 1H), 7.56 (t,  $J = 7.6$  Hz, 1H), 7.31 (d,  $J = 8.1$  Hz, 1H), 2.64 (s, 3H).

**3-((4-cyanonaphthalen-1-yl)amino)benzoic acid (6)**

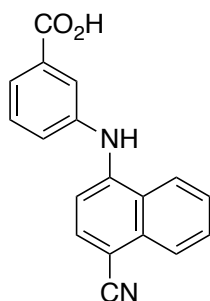

**<sup>1</sup>H NMR** (500 MHz, DMSO-*d*<sub>6</sub>) δ 9.21 (s, 1H), 8.52 (d, *J* = 8.5 Hz, 1H), 8.09 (d, *J* = 8.3 Hz, 1H), 7.97 (d, *J* = 8.2 Hz, 1H), 7.92 (t, *J* = 2.0 Hz, 1H), 7.84 (t, *J* = 7.6 Hz, 1H), 7.73 (t, *J* = 7.6 Hz, 1H), 7.69 (d, *J* = 7.7 Hz, 1H), 7.65 – 7.59 (m, 1H), 7.55 (t, *J* = 7.8 Hz, 1H), 7.24 (d, *J* = 8.1 Hz, 1H).

**3-((4-(trifluoromethyl)naphthalen-1-yl)amino)benzoic acid (7)**

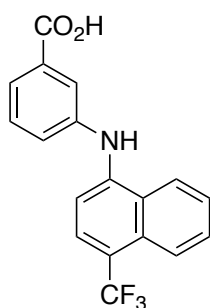

**<sup>1</sup>H NMR** (500 MHz, DMSO-*d*<sub>6</sub>) δ 12.72 (s, 1H), 9.24 – 9.06 (m, 1H), 8.88 (s, 1H), 8.45 – 8.31 (m, 1H), 8.14 (d, *J* = 8.2 Hz, 1H), 7.83 (t, *J* = 1.9 Hz, 1H), 7.65 (ddd, *J* = 8.7, 6.7, 1.4 Hz, 1H), 7.57 (ddt, *J* = 8.4, 5.0, 1.8 Hz, 2H), 7.50 (ddd, *J* = 8.1, 2.4, 1.3 Hz, 1H), 7.45 (t, *J* = 7.8 Hz, 1H), 7.26 (d, *J* = 8.2 Hz, 1H).

**3-((4-fluoronaphthalen-1-yl)amino)benzoic acid (8)**

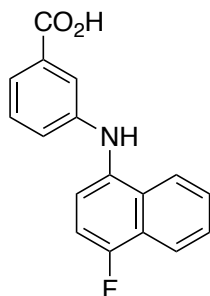

**<sup>1</sup>H NMR** (500 MHz, DMSO-*d*<sub>6</sub>) δ 12.72 (s, 1H), 8.31 (s, 1H), 8.14 – 8.09 (m, 1H), 8.08 – 8.01 (m, 1H), 7.65 (ddd, *J* = 8.4, 6.9, 1.4 Hz, 1H), 7.61 (ddd, *J* = 8.2, 6.8, 1.6 Hz, 1H), 7.46 (t, *J* = 2.1 Hz, 1H), 7.36 – 7.22 (m, 4H), 7.09 (ddd, *J* = 7.9, 2.6, 1.2 Hz, 1H).

**3-(quinolin-4-ylamino)benzoic acid (9)**

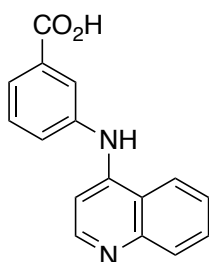

**<sup>1</sup>H NMR** (500 MHz, DMSO-*d*<sub>6</sub>) δ 9.13 (s, 1H), 8.51 (d, *J* = 5.2 Hz, 1H), 8.38 (dd, *J* = 8.5, 1.4 Hz, 1H), 7.92 (t, *J* = 2.1 Hz, 1H), 7.90 (dd, *J* = 8.5, 1.3 Hz, 1H), 7.72 (ddd, *J* = 8.4, 6.8, 1.5 Hz, 1H), 7.68 (dd, *J* = 7.6, 1.5 Hz, 1H), 7.63 (dd, *J* = 7.7, 3.1 Hz, 1H), 7.58 – 7.50 (m, 2H), 7.01 (d, *J* = 5.3 Hz, 1H).

**4-(naphthalen-1-ylamino)benzoic acid (10)**

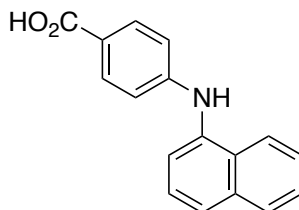

**<sup>1</sup>H NMR** (500 MHz, DMSO-*d*<sub>6</sub>) δ 8.77 (s, 1H), 8.06 (d, *J* = 8.2 Hz, 1H), 7.94 (d, *J* = 8.0 Hz, 1H), 7.76 (d, *J* = 8.4 Hz, 2H), 7.70 (d, *J* = 8.0 Hz, 1H), 7.58 – 7.44 (m, 4H), 6.93 (d, *J* = 8.5 Hz, 2H).

**4-((4-acetylnaphthalen-1-yl)amino)benzoic acid (11)**

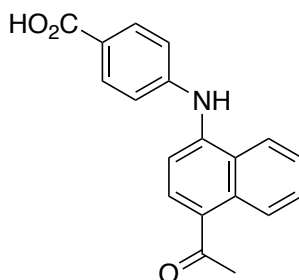

**<sup>1</sup>H NMR** (500 MHz, DMSO-*d*<sub>6</sub>) δ 12.46 (s, 1H), 9.15 (s, 1H), 8.95 (d, *J* = 8.5 Hz, 1H), 8.28 (d, *J* = 8.7 Hz, 1H), 8.16 (d, *J* = 8.2 Hz, 1H), 7.90 – 7.81 (m, 2H), 7.68 – 7.62 (m, 1H), 7.61 – 7.52 (m, 1H), 7.44 (d, *J* = 8.1 Hz, 1H), 7.24 (d, *J* = 8.9 Hz, 2H), 2.66 (s, 3H).

**2-(naphthalen-1-ylamino)benzoic acid (12)**

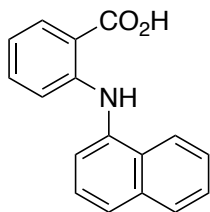

$^1\text{H NMR}$  (500 MHz, DMSO- $d_6$ )  $\delta$  13.16 (s, 1H), 10.03 (s, 1H), 8.19 – 7.86 (m, 3H), 7.75 (dd,  $J$  = 6.6, 2.7 Hz, 1H), 7.58 – 7.40 (m, 4H), 7.30 (ddd,  $J$  = 8.7, 7.0, 1.8 Hz, 1H), 6.89 (d,  $J$  = 8.4 Hz, 1H), 6.81 – 6.64 (m, 1H).

**4-methoxy-2-(naphthalen-1-ylamino)benzoic acid (13)**

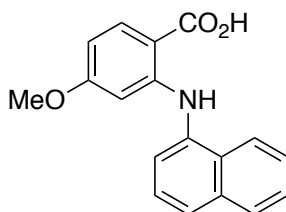

$^1\text{H NMR}$  (500 MHz, DMSO- $d_6$ )  $\delta$  12.81 (s, 1H), 10.20 (s, 1H), 7.96 (td,  $J$  = 6.8, 3.6 Hz, 2H), 7.92 – 7.83 (m, 1H), 7.76 (d,  $J$  = 7.9 Hz, 1H), 7.61 – 7.43 (m, 4H), 6.38 (d,  $J$  = 2.6 Hz, 1H), 6.36 (s, 1H), 3.61 (s, 3H).

**5-acetyl-2-(naphthalen-1-ylamino)benzoic acid (14)**

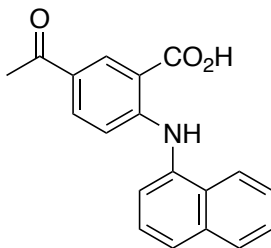

$^1\text{H NMR}$  (500 MHz, DMSO- $d_6$ )  $\delta$  10.42 (s, 1H), 8.55 (d,  $J$  = 2.3 Hz, 1H), 8.01 (dd,  $J$  = 7.4, 2.4 Hz, 1H), 7.96 – 7.86 (m, 2H), 7.83 (dd,  $J$  = 8.9, 2.4 Hz, 1H), 7.56 (td,  $J$  = 6.7, 2.4 Hz, 4H), 6.72 (d,  $J$  = 9.0 Hz, 1H), 2.46 (s, 3H).

**5-acetyl-2-((4-nitronaphthalen-1-yl)amino)benzoic acid (15)**



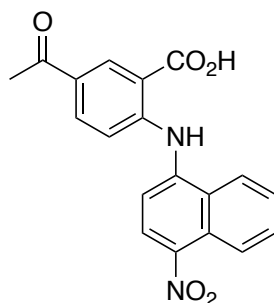

**<sup>1</sup>H NMR** (500 MHz, DMSO-*d*<sub>6</sub>) δ 12.78 (s, 1H), 8.69 (d, *J* = 8.8 Hz, 1H), 8.62 (d, *J* = 2.6 Hz, 1H), 8.42 (d, *J* = 8.7 Hz, 1H), 8.32 (d, *J* = 8.6 Hz, 1H), 7.98 (dd, *J* = 8.7, 2.5 Hz, 1H), 7.86 (t, *J* = 7.8 Hz, 1H), 7.76 (t, *J* = 7.8 Hz, 1H), 7.68 (d, *J* = 8.7 Hz, 1H), 7.53 (d, *J* = 8.7 Hz, 1H), 2.54 (s, 3H).

**5,5-dimethyl-3-(4-nitronaphthalen-1-yl)imidazolidine-2,4-dione (16)**

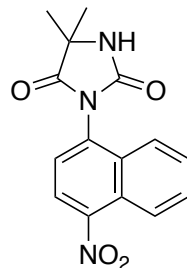

**<sup>1</sup>H NMR** (500 MHz, Chloroform-*d*) δ 8.57 (dt, *J* = 8.9, 1.1 Hz, 1H), 8.26 (d, *J* = 8.1 Hz, 1H), 7.85 – 7.73 (m, 1H), 7.73 – 7.68 (m, 2H), 7.53 (d, *J* = 8.1 Hz, 1H), 5.85 (s, 1H), 1.72 (s, 3H), 1.65 (s, 3H).

**5,5-dimethyl-3-(4-nitronaphthalen-1-yl)-2-thioxoimidazolidin-4-one (17)**

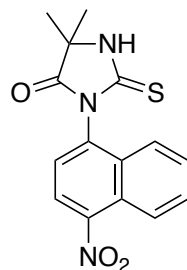

**<sup>1</sup>H NMR** (500 MHz, DMSO-*d*<sub>6</sub>) δ 11.04 (s, 1H), 8.47 (d, *J* = 8.1 Hz, 1H), 8.41 (dd, *J* = 8.7, 1.1 Hz, 1H), 7.93 – 7.87 (m, 2H), 7.85 – 7.79 (m, 2H), 1.66 (s, 3H), 1.60 (s, 3H).

**Table 1S.** Gridbox parameters for docking experiments

| Target                                              | Coordinate Centers |       |       |
|-----------------------------------------------------|--------------------|-------|-------|
|                                                     | X                  | Y     | Z     |
| AKR1C3<br>(PDB: 4DBS)                               | 24.228             | 6.772 | 6.007 |
| AR-LBD S-1 (PDB:<br>2AXA) and W741 L<br>(PDB: 1Z95) | 26.787             | 2.027 | 9.129 |
